# Supplementary material for: New metastable interfacial synthesis of a silver-terephthalate metal organic framework: structure, morphology and antibacterial activities
Source: Royal Society of Chemistry journal article supplement (doi:10.1039/d3ma00512g), 2023-10-16
Supplement: d3ma00512g1.pdf [file d3ma00512g1.pdf]

## Electronic Supplementary Information

### New Metastable Interfacial Syntheses of a Silver-terephthalate Metal Organic Framework: Structure, Morphology and Antibacterial activities

Vincenzo Paratore<sup>a†</sup>, Domenico Franco<sup>b†</sup>, Salvatore Guglielmino<sup>c</sup>, Francesca Lo Presti<sup>a</sup>, Francesco Traina<sup>d</sup>, Sabrina Conoci<sup>b,e,f</sup> and Guglielmo Guido Condorelli<sup>a,g\*</sup>

<sup>a</sup> Department of Chemical Science, University of Catania, v.le A. Doria 6, 95125, Catania, Italy. Email: guido.condorelli@umict.it

<sup>b</sup> Department of Chemical, Biological, Pharmaceutical and Environmental Sciences (ChiBioFarAm), University of Messina, Viale F. Stagno d'Alcontres 31, 98166 Messina Italy.

<sup>c</sup> IBMTech s.r.l., Via Alderaban 11A - 95127 Catania, Italy

<sup>d</sup> Dipartimento di Scienze Biomediche e Neuromotorie - Alma Mater Studiorum—University of Bologna, Bologna, Italy

<sup>e</sup> Department of Chemistry "Giacomo Ciamician", Alma Mater Studiorum—University of Bologna, Bologna, Italy

<sup>f</sup> LAB Sense Beyond Nano—URT Department of Sciences Physics and Technologies of Matter (DSFTM) CNR, Messina, Italy

<sup>g</sup> Consorzio Interuniversitario di Scienze e Tecnologie dei Materiali (INSTM) UdR of Catania, Catania, Italy

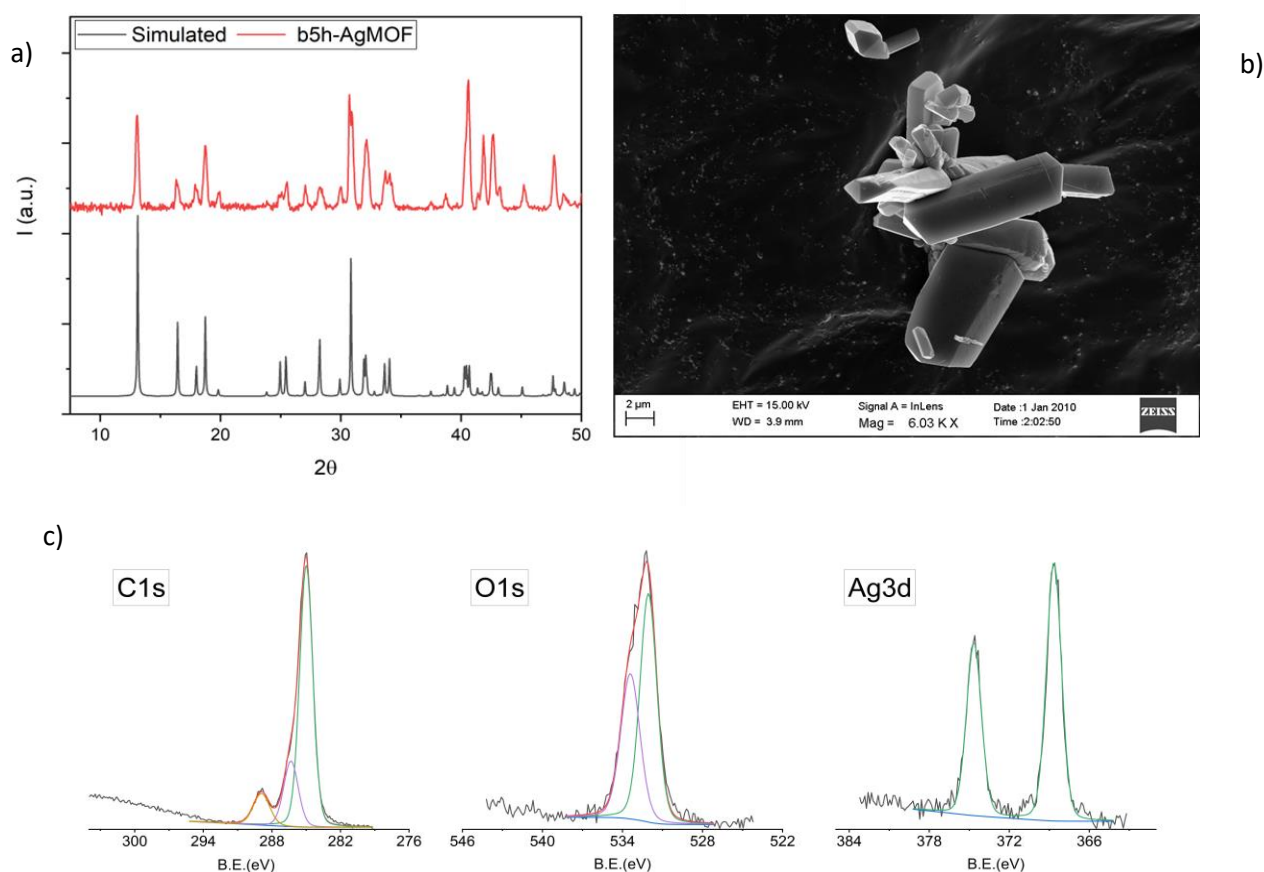

Figure S 1: a) XRD pattern of AgMOF simulated curve and route b5h-AgMOF, b) SEM picture of high crystalline of route a 5h AgMOF, c) XPS analysis of b5h-AgMOF confirm the formation of carboxylate groups thanks to the C and O 1s peaks and the presence of silver ions thanks to the Ag3d peak.

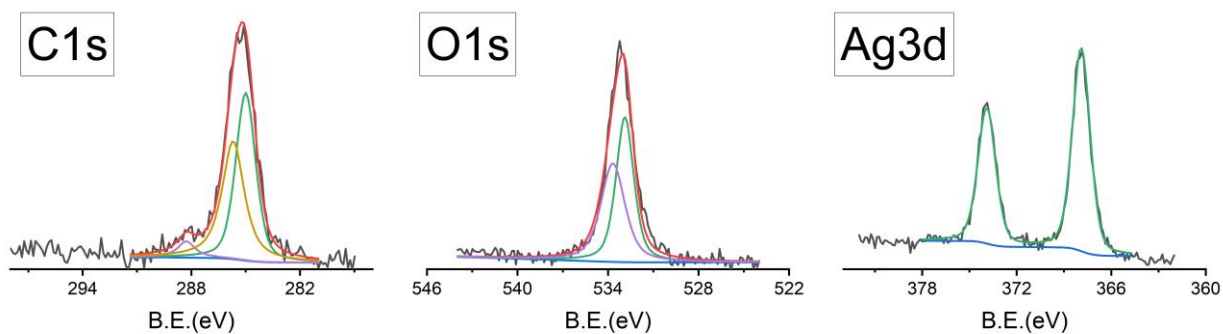

Figure S 2: XPS analysis of b-AgMOF. C1s and O1s peaks confirms the formation of carboxylate groups and the Ag3d peak the presence of silver ions in the crystalline structure.

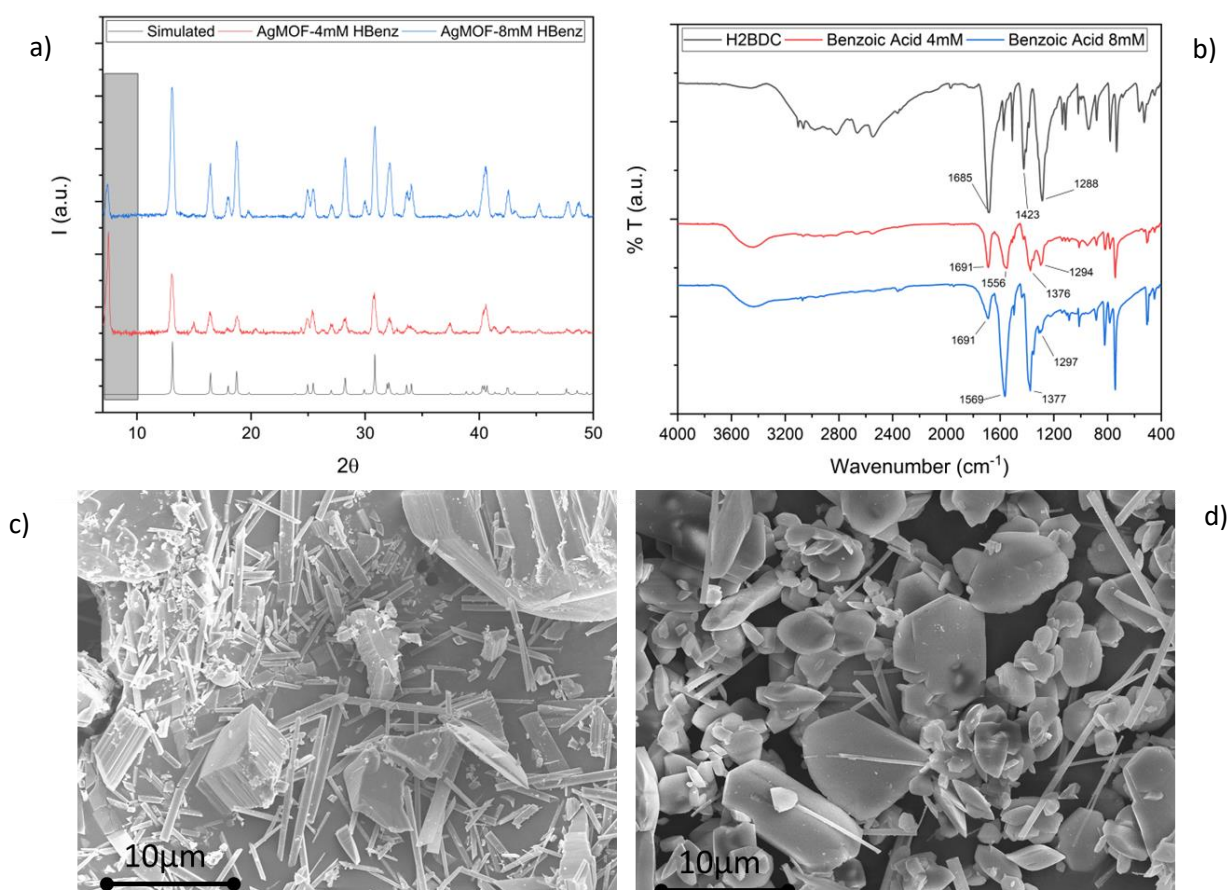

Figure S 3: a) XRD patterns comparison of simulated AgMOF, 4mM and 8mM Benzoic acid modulated c-AgMOF; b) IR comparison between terephthalic acid, 4mM and 8mM Benzoic acid modulated c-AgMOF; c) SEM picture of 4mM Benzoic acid modulated c-AgMOF; d) SEM picture of 8mM Benzoic acid modulated c-AgMOF.

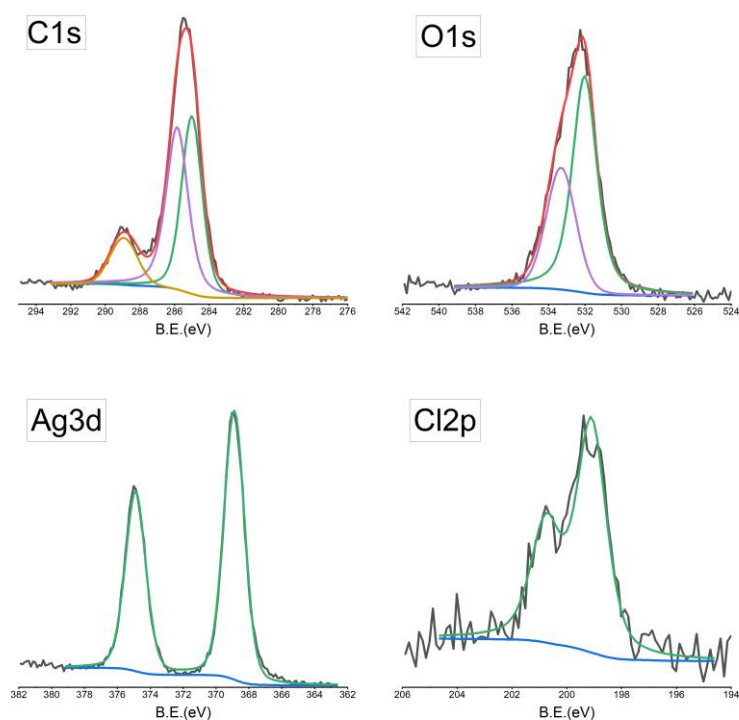

Figure S 4: XPS analysis of the c(KCl)-AgMOF. C1s and O1s peaks confirm the formation of carboxylate groups and the Ag3d peak the presence of silver ions in the crystalline structure. In this case the observed Cl 2p signal and its Binding Energy value suggest that residual Cl<sup>-</sup> ions are present.

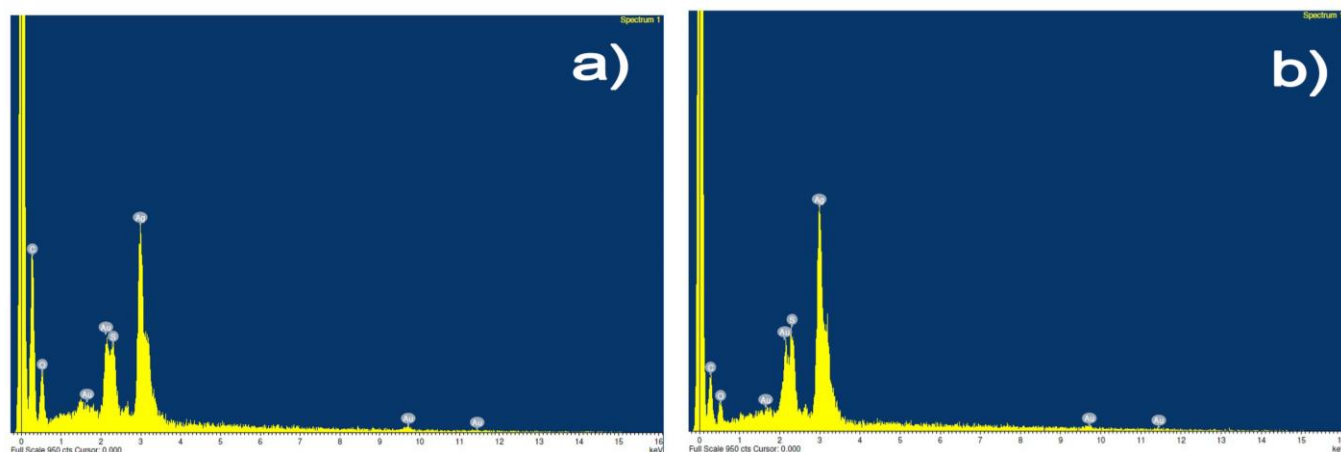

Figure S 5: EDX analysis of b-AgMOF before (a) and after (b) 24 h incubation in the cultural medium.

As reported in Table S1, EDX characterization shows a decrease in the carbon content present in the material, an increase in the silver rate, while the oxygen content remains stable. This is attributed to the material's slow degradation in solution, in which the organic binder and silver ions are released. Silver can precipitate as oxides in the culture medium, explaining the constant oxygen rate in the material. Additionally, the presence of sulphur is observed, likely due to minor contaminations of DMSO.

| b-AgMOF (atomic %) | C    | O    | Ag   | S   |
|--------------------|------|------|------|-----|
| Dry                | 70,1 | 17,3 | 9,6  | 3   |
| 24h                | 54,7 | 18,8 | 19,7 | 6,8 |

Table S 1: EDX atomic percentual obtained by the b-AgMOF as dry and after 24h of incubation period in culture medium before the inoculation of bacterial strains.

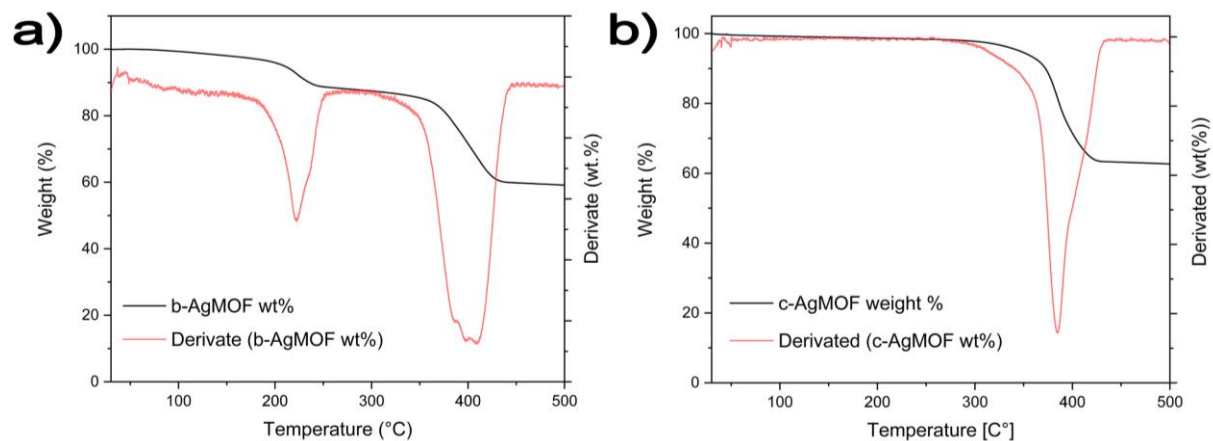

Figure S 6: a) b-AgMOF TGA analysis in black and derivate curve in red. b) c-AgMOF TGA analysis in black and derivate curve in red.
